# Supplementary material for: Sliding ferroelectricity and the moiré effect in Janus bilayer MoSSe
Source: Royal Society of Chemistry journal article supplement (doi:10.1039/d3nr05730e), 2024-01-01
Supplement: d3nr05730e1.pdf [file d3nr05730e1.pdf]

# Supplemental Material

## Sliding ferroelectricity and moiré effect in Janus

### bilayer MoSSe

Liyan Lin,<sup>1,2</sup> Xueqin Hu,<sup>1,2</sup> Ruijie Meng,<sup>1,2</sup> Xu Li<sup>3,4</sup>, Yandong Guo,<sup>1,2,5,\*</sup> Yue Jiang,<sup>6</sup> Dongdong Wang,<sup>1,2</sup> Haixia Da,<sup>1,2</sup> Yurong Yang<sup>3,4,\*</sup> and Xiaohong Yan<sup>1,2,7,\*</sup>

<sup>1</sup>*College of Electronic and Optical Engineering, Nanjing University of Posts and Telecommunications, Nanjing 210046, China*

<sup>2</sup>*Key Laboratory of Radio Frequency and Micro-Nano Electronics of Jiangsu Province, Nanjing 210023, China*

<sup>3</sup>*National Laboratory of Solid State Microstructures and Collaborative Innovation Center of Advanced Microstructures, Department of*<sup>4</sup>*Materials Science and Engineering, Nanjing University, Nanjing 210093, China*

<sup>5</sup>*College of Natural Science, Nanjing University of Posts and Telecommunications, Nanjing 210046, China*

<sup>6</sup>*College of Science, Jinling Institute of Technology, Nanjing 211169, China*

<sup>7</sup>*Jiangsu University, Zhenjiang 212013, China*

**Table S1.** The relaxed lattice parameters, and structural parameters such as bond lengths and bond angles of the Janus bilayer MoSSe structure with AA stacking. The parameter D represents the interlayer distance between the nearest neighboring atomic layers of the upper and lower layers.

| configuration | Lattice parameter |  | Bond length (Å) |       | Angle (°)            |                     | D (Å) |                       |
|---------------|-------------------|--|-----------------|-------|----------------------|---------------------|-------|-----------------------|
|               | a=b               |  | Mo-S            | Mo-Se | $\angle\text{SMoSe}$ | $\angle\text{SMoS}$ |       | $\angle\text{SeMoSe}$ |
| Se-Se         | 3.22              |  | 2.41            | 2.52  | 82.08                | 83.83               | 79.25 | 3.73                  |
| S-S           | 3.22              |  | 2.41            | 2.52  | 82.01                | 83.94               | 79.25 | 3.55                  |
| S-Se          | 3.22              |  | 2.41            | 2.52  | 82.04                | 83.92               | 79.22 | 3.64                  |

**Table S2.** The energy difference of AB stacking for S-S, Se-Se, and S-Se configurations. The parameter D represents the interlayer distance between the nearest neighboring atomic layers of the upper and lower layers.

| Structure        | AB stacking |       |      |
|------------------|-------------|-------|------|
|                  | Se-Se       | S-S   | S-Se |
| $\Delta E$ (meV) | 0           | 13.78 | 0.30 |
| D (Å)            | 3.24        | 2.99  | 3.08 |

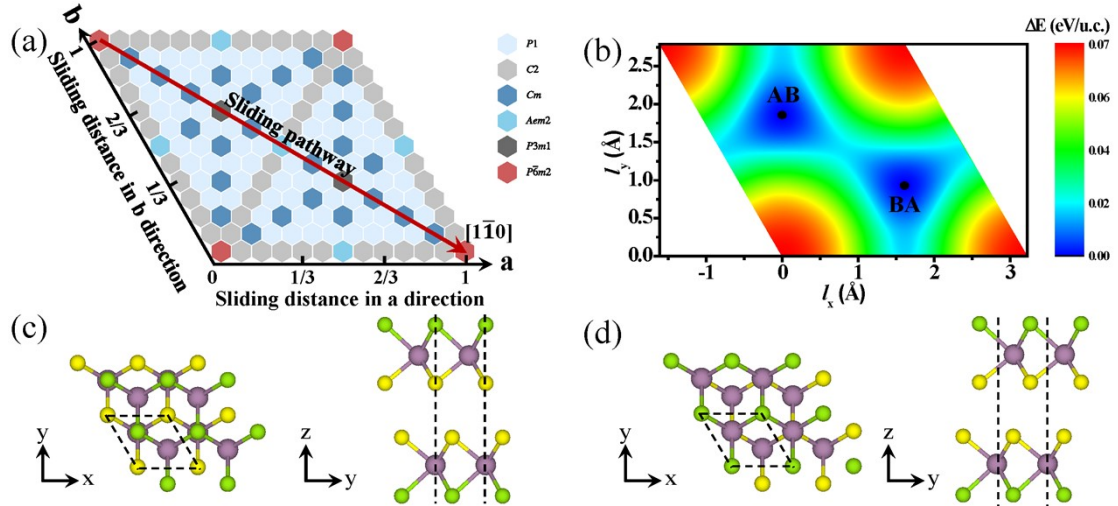

**Fig. S1.** (a) Illustration of the structural space group of the S-S configuration sliding in the  $ab$ -plane. Each honeycomb data point represents a slided structure. Different colors indicate different space groups. (b) The energy contour plot of bilayer Se-Se configuration versus the sliding distance ( $l_x$ ,  $l_y$ ). The contour colors illustrate the energy difference of the unit cell relative to the energy of ground state (AB stacking and BA stacking). (c)-(d) The top and side views of the two lowest-energy ground-state structures in Fig. S1(b), the AB stacking and the BA stacking, respectively.

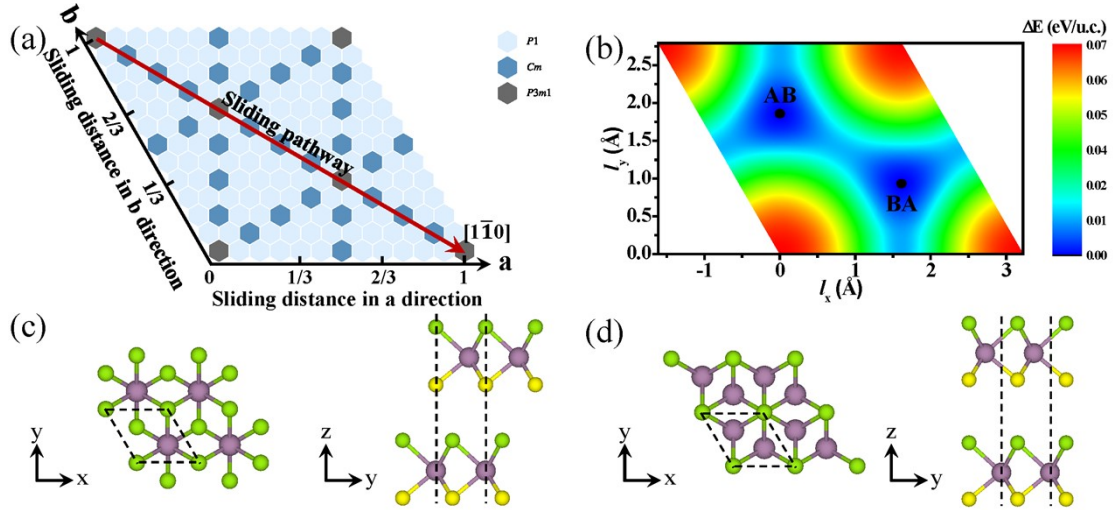

**Fig. S2.** (a) Illustration of the structural space group of the S-Se configuration sliding in the  $ab$ -plane. Each honeycomb data point represents a slided structure. Different colors indicate different space groups. (b) The energy contour plot of bilayer Se-Se configuration versus the sliding distance ( $l_x$ ,  $l_y$ ). The contour colors illustrate the energy difference of the unit cell relative to the energy of ground state (AB stacking and BA stacking). (c)-(d) The top and side views of the two lowest-energy ground-state structures in Fig. S2(b), the AB stacking and the BA stacking, respectively.

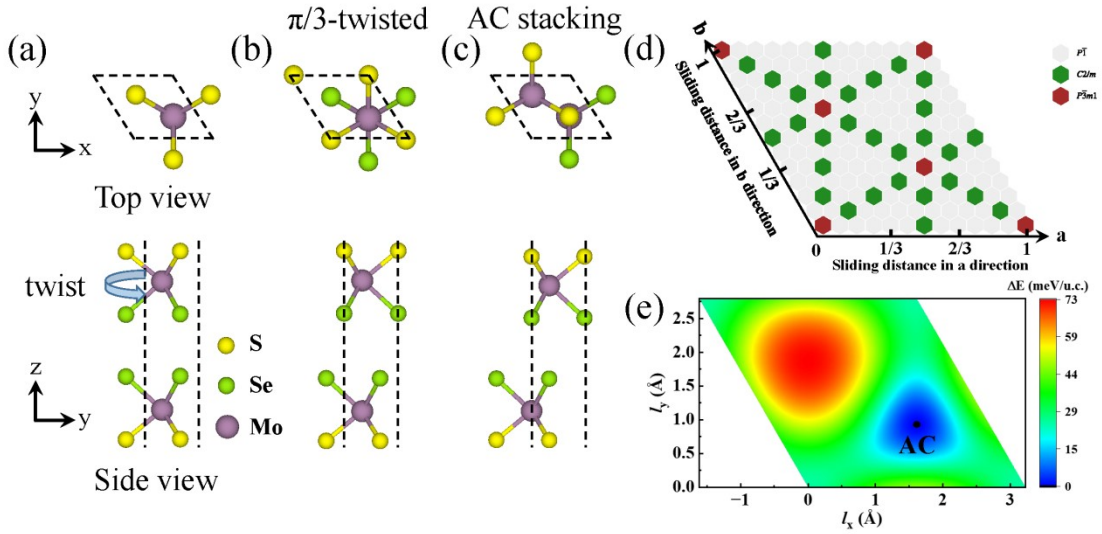

**Fig. S3.** (a)-(b) The top and side views of untwisted and  $\pi/3$ -twisted of AA stacking structures in Se-Se configuration. (c) The top and side views of AC stacking. (d) Illustration of the structural space group of the  $\pi/3$ -twisted Se-Se configuration sliding in the  $ab$  plane. Each honeycomb data point represents a slided structure. Different colors indicate different space groups. (e) The energy contour plot of bilayer Se-Se configuration versus the sliding distance ( $l_x$ ,  $l_y$ ). The contour colors illustrate the energy difference of the unit cell relative to the energy of ground state (AC stacking).

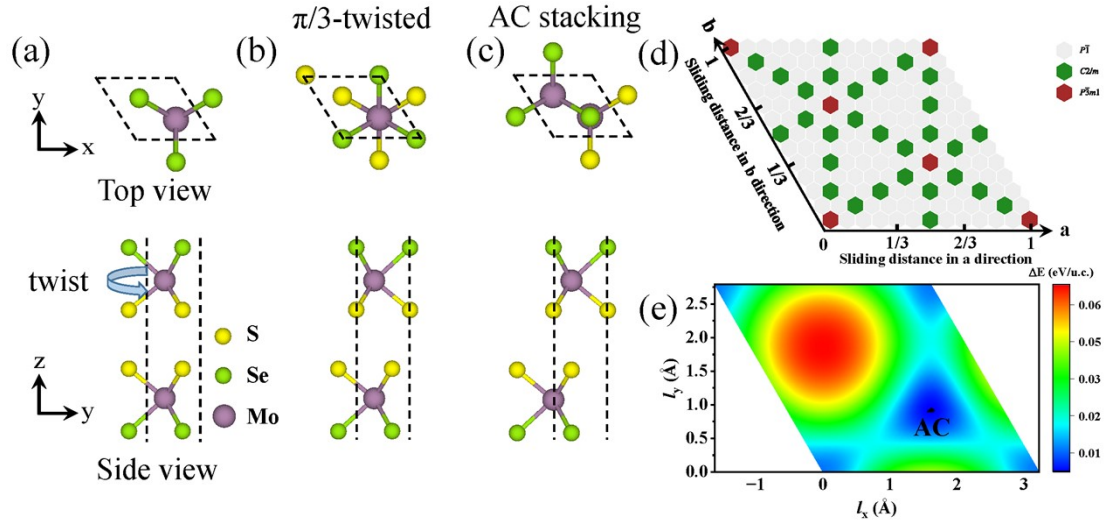

**Fig. S4.** (a)-(b) The top and side views of untwisted and  $\pi/3$ -twisted of AA stacking structures in S-S configuration. (c) The top and side views of AC stacking. (D) Illustration of the structural space group of the  $\pi/3$ -twisted S-S configuration sliding in the  $ab$  plane. Each honeycomb data point represents a slided structure. Different colors indicate different space groups. (E) The energy contour plot of bilayer S-S configuration versus the sliding distance ( $l_x$ ,  $l_y$ ). The contour colors illustrate the energy difference of the unit cell relative to the energy of ground state (AC stacking).

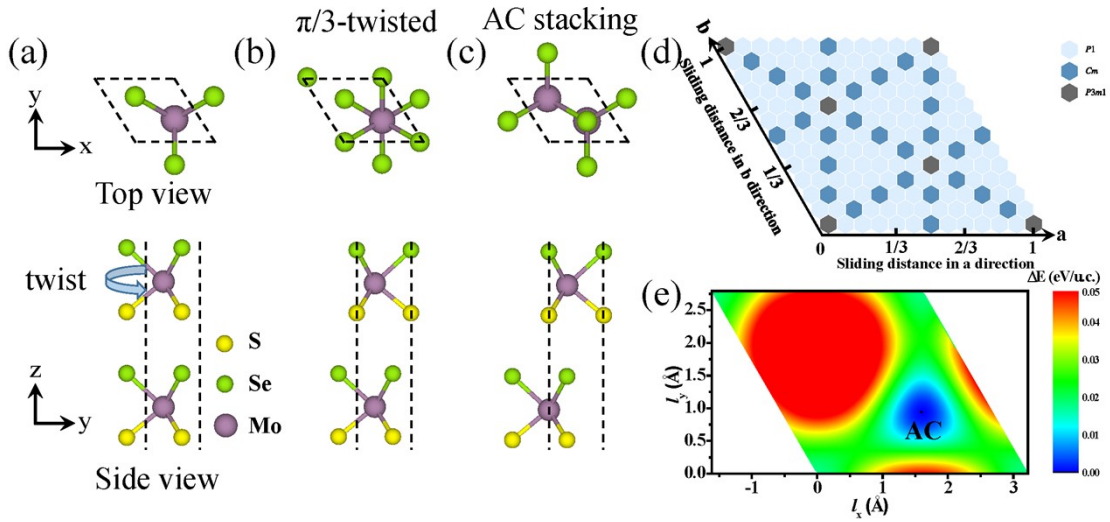

**Fig. S5.** (a)-(b) are the top and side views of untwisted and  $\pi/3$ -twisted of AA stacking structures in S-Se configuration. (c) The top and side views of AC stacking. (d) Illustration of the structural space group of the  $\pi/3$ -twisted S-Se configuration sliding in the  $ab$  plane. Each honeycomb data point represents a slided structure. Different colors indicate different space groups. (e) The energy contour plot of bilayer S-Se configuration versus the sliding distance ( $l_x$ ,  $l_y$ ). The contour colors illustrate the energy difference of the unit cell relative to the energy of ground state (AC stacking).

**Table S3.** The interlayer distance (D) and out-of-plane polarization (OP) of the optimized AB stacking are corrected with different vdW functionals.

| Configuration | OP & D<br>(pC/m)<br>& (Å) | vdW functional |        |         |             |            |            |
|---------------|---------------------------|----------------|--------|---------|-------------|------------|------------|
|               |                           | DFT-D3         | DFT-D2 | vdW-DF2 | optB86b-vdW | optB88-vdW | optPBE-vdW |
| Se-Se         | OP                        | -0.42          | -0.45  | -0.25   | -0.45       | -0.40      | -0.28      |
|               | D                         | 3.24           | 3.23   | 3.49    | 3.22        | 3.27       | 3.422      |
| S-S           | OP                        | -0.84          | -0.77  | -0.55   | -0.87       | -0.79      | -0.58      |
|               | D                         | 3.00           | 3.04   | 3.20    | 2.98        | 3.02       | 3.16       |

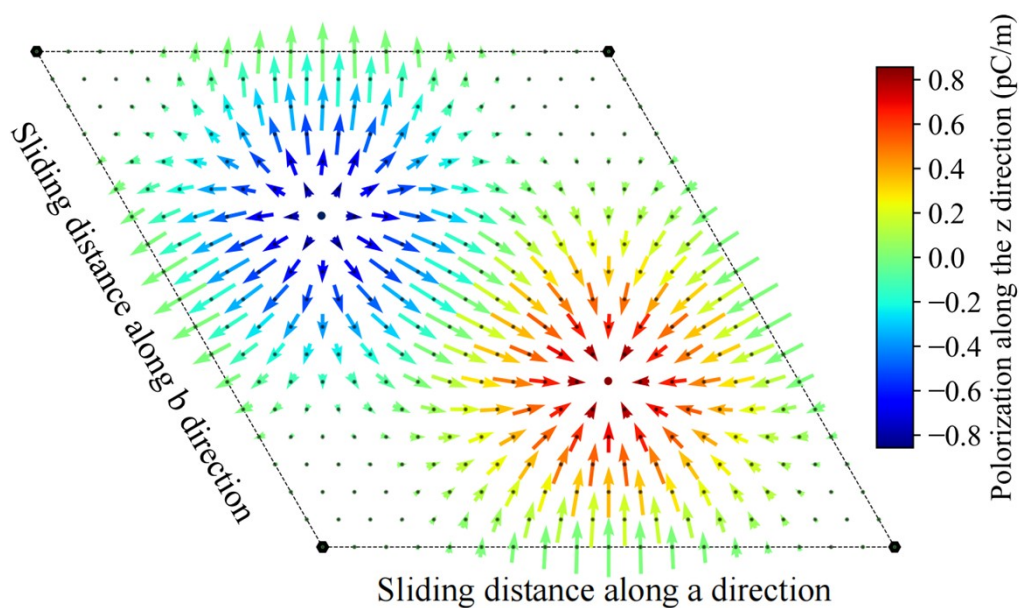

**Fig. S6.** Diagram of in-plane and out-of-plane polarization of sliding structures for S-S configuration. The color contour map shows the magnitude and direction of out-of-plane polarization. The arrow indicates the direction of in-plane polarization. The length of the arrows in the diagram represents the magnitude of the in-plane polarization, with longer arrows indicating a greater polarization. The longest arrow signifies the maximum in-plane polarization of 1.28 pC/m.



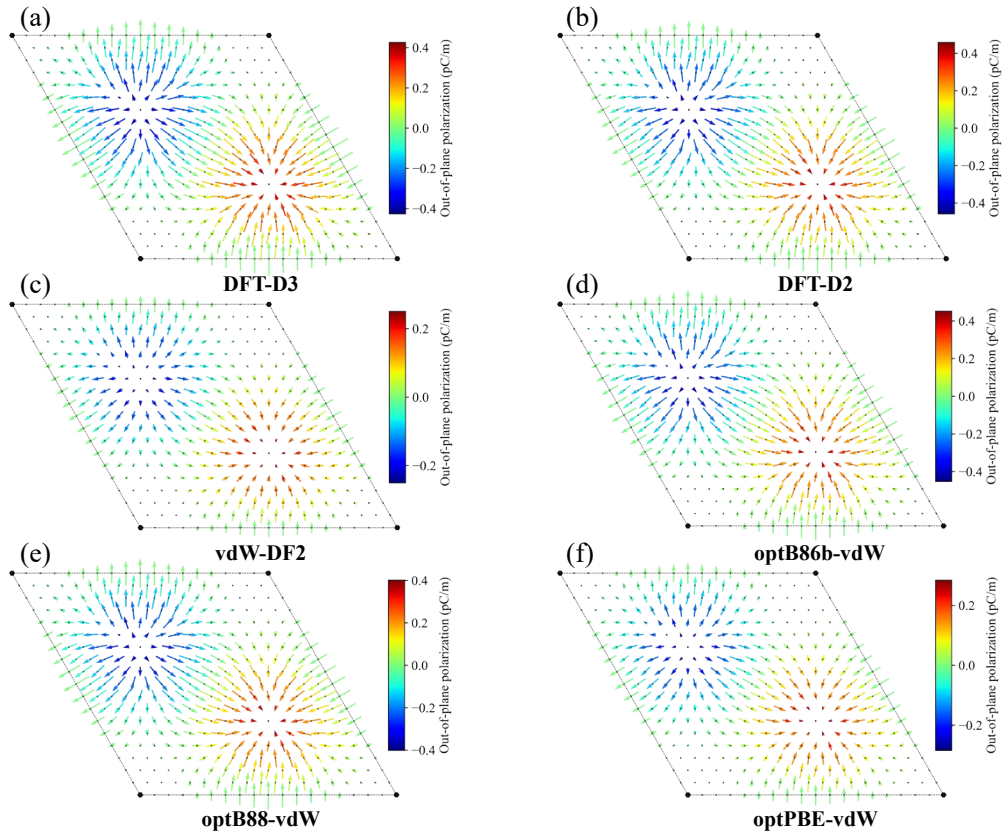

**Fig. S7.** The in-plane and out-of-plane polarization of the sliding structure in the Se-Se configuration, were computed using six different vdW functionals, specifically (a) DFT-D3, (b) DFT-D2, (c) vdW-DF2, (d) optB86b-vdW, (e) optB88-vdW, and (f) optPBE-vdW, respectively. The color contour map shows the magnitude and direction of out-of-plane polarization. The arrow indicates the direction of in-plane polarization. The length of the arrows in the diagram represents the magnitude of the in-plane polarization, with longer arrows indicating a greater polarization.

**Table S4.** Predicted 2D sliding ferroelectric. The " $P_{\perp}$ " symbol denotes out-of-plane polarization. And the " $P_{\parallel}$ " denotes in-plane polarization.

| Materials                            | $P_{\perp}$ | $P_{\parallel}$ | Thickness |
|--------------------------------------|-------------|-----------------|-----------|
| BN [1]                               | 2.08 pC/m   | -               | Bilayer   |
| InSe [1]                             | 0.24 pC/m   | -               | Bilayer   |
| MoS <sub>2</sub> [1]                 | 0.97 pC/m   | -               | Bilayer   |
| GaSe [1]                             | 0.46 pC/m   | -               | Bilayer   |
| GaN [1]                              | 9.72 pC/m   | -               | Bilayer   |
| MoSi <sub>2</sub> N <sub>4</sub> [2] | 3.36 pC /m  | -               | Bilayer   |
| MoGe <sub>2</sub> N <sub>4</sub> [2] | 3.05 pC/m   | -               | Bilayer   |
| CrSi <sub>2</sub> N <sub>4</sub> [2] | 2.49 pC/m   | -               | Bilayer   |
| WSi <sub>2</sub> N <sub>4</sub> [2]  | 3.44 pC/m   | -               | Bilayer   |
| BP [3]                               | 1.07 pC/m   | -               | Bilayer   |
| BAs [3]                              | 0.96 pC/m   | -               | Bilayer   |
| BSb [3]                              | 3.70 pC/m   | -               | Bilayer   |
| AlN [3]                              | 7.19 pC/m   | -               | Bilayer   |
| GaN [3]                              | 5.76 pC/m   | -               | Bilayer   |
| InN [3]                              | 13.83 pC/m  | -               | Bilayer   |
| SiC [3]                              | 2.89 pC/m   | -               | Bilayer   |
| GeC [3]                              | 2.78 pC/m   | -               | Bilayer   |
| SnC [3]                              | 4.41 pC/m   | -               | Bilayer   |
| MnSe [4]                             | 2.70 pC/m   | -               | Bilayer   |
| MoSe <sub>2</sub> [5]                | 0.59 pC/m   | -               | Bilayer   |
| WS <sub>2</sub> [5]                  | 0.69 pC/m   | -               | Bilayer   |
| WSe <sub>2</sub> [5]                 | 0.73 pC/m   | -               | Bilayer   |
| MoSSe-SS (AB stacking)               | 0.86 pC/m   | -               | Bilayer   |
| MoSSe-SS (TS stacking)               | -           | 1.2 pC/m        | Bilayer   |

[1] Li, Lei and Menghao Wu. Binary compound bilayer and multilayer with vertical polarizations: Two-dimensional ferroelectrics, multiferroics, and nanogenerators. ACS nano 11 6 (2017): 6382.

[2] Zhong, Tingting et al. Sliding ferroelectricity in two-dimensional MoA<sub>2</sub>N<sub>4</sub> (A = Si or Ge) bilayers: high polarizations and Moiré potentials. Journal of Materials Chemistry A 9 35 (2021): 19659.

[3] Wang, Zhe et al. Sliding ferroelectricity in bilayer honeycomb structures: A first-principles study. Physical Review B 107 3 (2023): 035426.

[4] Liu, Kehan et al. Tunable sliding ferroelectricity and magnetoelectric coupling in two-dimensional multiferroic MnSe materials. npj Computational Materials 9 (2023): 1.

[5] Jafari, Hodayoun et al. Robust Zeeman-type band splitting in sliding ferroelectrics. arXiv 2308 (2023): 15241.

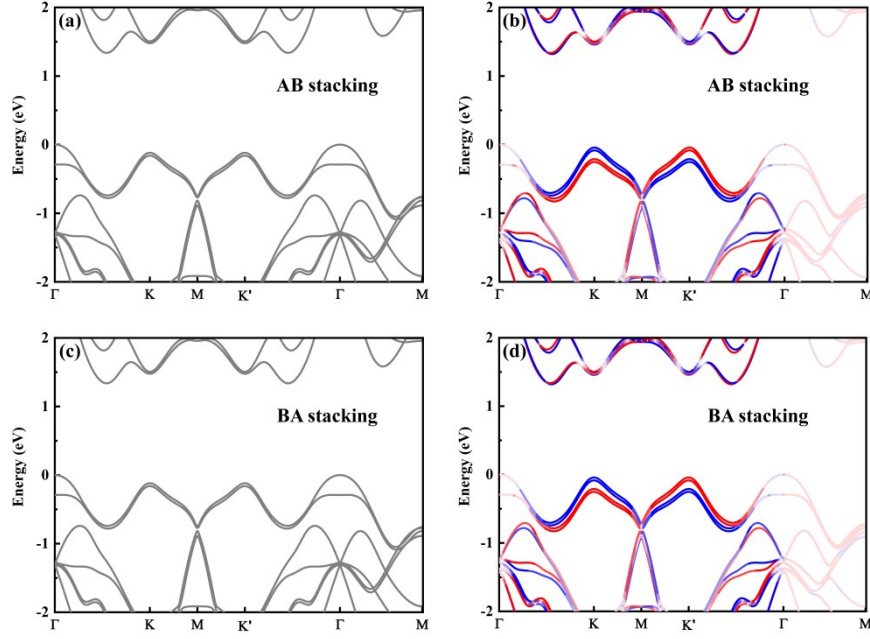

**Figure R8.** The electronic band structures of Se-Se configuration. (a) and (b) are the electronic band structures for AB stacking with PBE and PBE+SOC, respectively. (c) and (d) are the electronic band structures for BA stacking with PBE and PBE+SOC, respectively. The color depth indicates the quantity of the projected contribution.

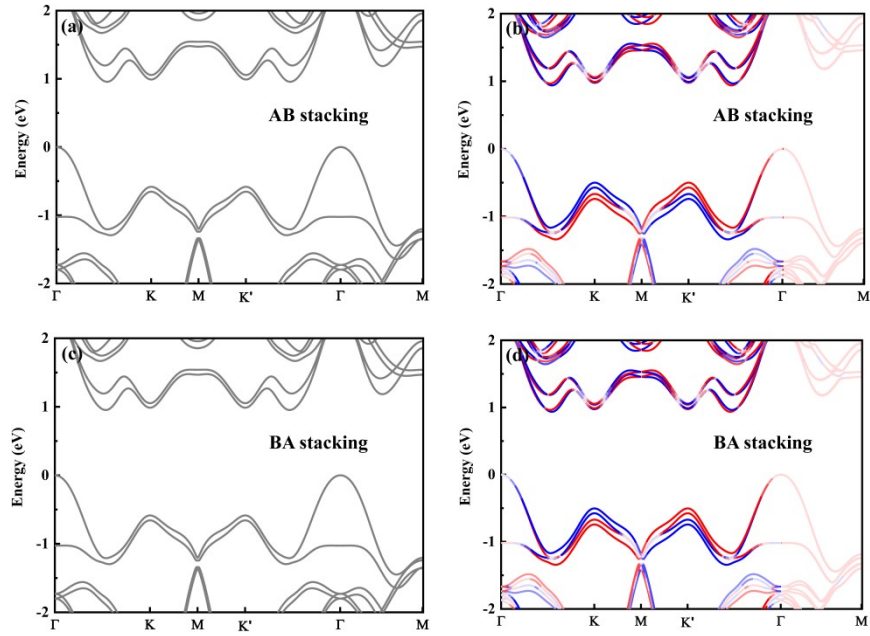

**Figure S9.** The electronic band structures of S-S configuration. (a) and (b) are the electronic band structures for AB stacking with PBE and PBE+SOC, respectively. (c) and (d) are the electronic band structures for BA stacking with PBE and PBE+SOC, respectively. The color depth indicates the quantity of the projected contribution.
